# Supplementary material for: iTRAQ-based Protein Profiling and Fruit Quality Changes at Different Development Stages of Oriental Melon
Source: PubMed Central journal article supplement (PMC5273850; doi:10.1186/s12870-017-0977-7), 2017-01-28
Supplement: 12870_2017_977_MOESM1_ESM.pdf [file 12870_2017_977_MOESM1_ESM.pdf]

### Additional file 1. Real-time PCR primers

| Gene    | Primer     | Sequence (5-3)             |
|---------|------------|----------------------------|
| CmLOX01 | Cm LOX01-F | CCATCAACTTATCAGCCATT       |
|         | Cm LOX01-R | GTTCGTTCAAGAAGACCAT        |
| CmLOX02 | Cm LOX02-F | TAGCACCGAAGGAATCAC         |
|         | Cm LOX02-R | AGACAGCACAATAACAGAGT       |
| CmLOX03 | Cm LOX03-F | GACGACGAGAATGGAGAG         |
|         | Cm LOX03-R | GCTGGTTGAACTGTTGATAC       |
| CmLOX04 | Cm LOX04-F | GCTCAGTGAAGTTATCAAGA       |
|         | Cm LOX04-R | GCTCAGTGAAGTTATCAAGA       |
| CmLOX05 | Cm LOX05-F | GCTGCTTGTTCTCCTATTA        |
|         | Cm LOX05-R | AGTCTTCAACTGCCATTC         |
| CmLOX06 | Cm LOX06-F | GTGTATGTTCCAAGAGATG        |
|         | Cm LOX06-R | TGAATAAGTTGAGGAGTA         |
| CmLOX07 | Cm LOX07-F | TACTTGAGGAATGGATA          |
|         | Cm LOX07-R | TTGTTGTAACGGTGAGAC         |
| CmLOX08 | Cm LOX08F  | GGTAACTGGTCGTGGAAT         |
|         | Cm LOX08-R | AAGGCAGAGGAATAACAGAA       |
| CmLOX09 | Cm LOX09-F | CAGATCCATCTTGTGAAC         |
|         | Cm LOX09-R | AGTTGGTAGAGTCATTCC         |
| CmLOX10 | Cm LOX10-F | TGACAGGACAAGGAGTTC         |
|         | Cm LOX10-R | CGGTATTGGCAAGAATGTTA       |
| CmLOX11 | Cm LOX11-F | CAAGTCATTCTCCAGATG         |
|         | Cm LOX11-R | GTTGATAAGGTCCAATCC         |
| CmLOX12 | Cm LOX12-F | GTTAAGTTCCTCAGCATACG       |
|         | Cm LOX12-R | ACGAGGATGGATAGTAATG        |
| CmLOX13 | Cm LOX13-F | CAAGCAACACAGGTAATG         |
|         | Cm LOX13-R | CTCCAGTTCTATTCTTCAAG       |
| CmLOX14 | Cm LOX14-F | CAAGTGAACCAGATAACAAG       |
|         | Cm LOX14-R | CAGAGGAATTGGAATGAAG        |
| CmLOX15 | CmLOX15-F  | CTATTATGCTGATGCTGAG        |
|         | CmLOX15-R  | GAAGGAAGTTGACAGATG         |
| CmLOX16 | Cm LOX16-F | ATACGGACCTCAAGAATC         |
|         | Cm LOX16-R | GAGTCAAAGTGTATCATCAG       |
| CmLOX17 | Cm LOX17-F | TGACTATCTAATGCCACTTC       |
|         | Cm LOX17-R | CCAACTTATCTCTTCTCCT        |
| CmLOX18 | Cm LOX18-F | TGGAGACTATCACAATCG         |
|         | Cm LOX18-R | CTTTCCCATCACCTCTAA         |
| CmAAT1  | Cm AAT1-F  | CCACAGGGGCCAGAATTACA       |
|         | Cm AAT1-R  | TGGAGGAGGCAAGCATAGACTT     |
| CmAAT2  | Cm AAT2-F  | CTATAATTGGAGGGTGTGGAATTATC |
|         | Cm AAT2-R  | AACATTTGCCCTAAATCTTCCAT    |
| CmAAT3  | Cm AAT3-F  | CGCTTGATGACATGGCACAT       |

---

|                |                  |                         |
|----------------|------------------|-------------------------|
|                | Cm <i>AAT3R</i>  | GGCCTTACGGATAGCAGAGATC  |
| Cm <i>AAT4</i> | Cm <i>AAT4-F</i> | CAGTTGTACCCCGTCGAGTA    |
|                | Cm <i>AAT4-R</i> | AATATCGCTTCTGATCGGAACAC |
| Cm <i>SSI</i>  | Cm <i>SSI-F</i>  | ATTGCCTACCTTTGCCACT     |
|                | Cm <i>SSI-R</i>  | TCCAGAATCCGTAAACTCCA    |
| Cm <i>SPSI</i> | Cm <i>SPSI-F</i> | CCATGAAAAGAATGGCAGCTG   |
|                | Cm <i>SPSI-R</i> | CGGAACTGTCATAGCAAAAGAG  |
| 18srRNA        | 18srRNA-F        | AAACGGCTACCACATCCA      |
|                | 18srRNA-R        | CACCAGACTTGCCCTCCA      |

---
