# Supplementary material for: iTRAQ-based Protein Profiling and Fruit Quality Changes at Different Development Stages of Oriental Melon
Source: PubMed Central journal article supplement (PMC5273850; doi:10.1186/s12870-017-0977-7), 2017-01-28
Supplement: 12870_2017_977_MOESM2_ESM.pdf [file 12870_2017_977_MOESM2_ESM.pdf]

**Additional file 2. Principal component loading matrix**

| Number | Volatile component          | Principal component |        |
|--------|-----------------------------|---------------------|--------|
|        |                             | 1                   | 2      |
| v1     | Ethyl Acetate               | 0.994               | -0.106 |
| v2     | Butyl 2-methyl acetate      | 0.994               | -0.106 |
| v3     | Hexyl acetate               | 0.994               | -0.106 |
| v4     | Allyl acetate               | 0.994               | -0.105 |
| v5     | Butyl acetate               | 0.999               | -0.028 |
| v6     | Phenethyl acetate           | 0.994               | -0.106 |
| v7     | 2,3-Butanedioldiacetate     | 0.994               | -0.106 |
| v8     | Allyl 2-ethyl butyrate      | 0.994               | -0.106 |
| v9     | Methyl cyclopropane acetate | 0.994               | -0.106 |
| v10    | Allyl decyl oxalate         | 0.993               | 0.117  |
| v11    | Allyl nonyl oxalate         | 0.994               | -0.106 |
| v12    | Benzyl acetate              | 0.994               | -0.106 |
| v13    | Cinnamyl acetate            | 0.994               | -0.106 |
| v14    | Birch-Me                    | -0.512              | 0.858  |
| v15    | Ethyl butyrate              | 0.994               | -0.106 |
| v16    | Allyl octyl oxalate         | 0.997               | -0.066 |
| v17    | (E)-2-hexenyl acetate       | 0.997               | 0.080  |
| v18    | 1-Ocenol                    | 0.285               | 0.803  |
| v19    | 4-Methyl 1-pentenol         | 0.709               | 0.672  |
| v20    | 1-Butanol                   | -0.225              | 0.925  |
| v21    | 3-Hexenol                   | 0.964               | 0.254  |
| v22    | TRANS-3-HEXEN-1-OL          | 0.925               | 0.363  |
| v23    | 1-HEPTEN-4-OL               | 0.988               | 0.149  |
| v24    | 2-Nonynol                   | -0.651              | -0.624 |
| v25    | 2-Pentenol                  | 0.830               | 0.534  |
| v26    | 1-Nonanol                   | 0.708               | 0.673  |
| v27    | 3-Buten-1-ol                | -0.225              | 0.926  |
| v28    | CIS-4-DECEN-1-OL            | 0.994               | -0.105 |
| v29    | 2-Methyl 4-nonanol          | -0.566              | -0.434 |
| v30    | Methylglyoxal               | 0.522               | -0.670 |
| v31    | Benzaldehyde                | 0.971               | 0.230  |
| v32    | (E,E)-2,4-nonadienal        | -0.224              | 0.926  |
| v33    | 3-Butanolal                 | -0.380              | -0.664 |
| v34    | Acetic acid glacial         | -0.736              | 0.663  |
| v35    | Hydroperoxide,pentyl        | -0.501              | .784   |
| v36    | Myristic acid               | 0.964               | .127   |
| v37    | Isobutyric acid             | -0.225              | .926   |
| v38    | 9-Octadecyne                | 0.994               | -.106  |
| v39    | Heptacosane                 | 0.415               | .654   |
| v40    | Allyl methyl sulfide        | 1.000               | -.005  |
