# Supplementary material for: iTRAQ-based Protein Profiling and Fruit Quality Changes at Different Development Stages of Oriental Melon
Source: PubMed Central journal article supplement (PMC5273850; doi:10.1186/s12870-017-0977-7), 2017-01-28
Supplement: 12870_2017_977_MOESM3_ESM.pdf [file 12870_2017_977_MOESM3_ESM.pdf]

**Additional file 3. Statistical results of protein identification**

| Database     | Total spectra | Spectra | Peptides | Unique peptides | Protein groups |
|--------------|---------------|---------|----------|-----------------|----------------|
| Cucumis melo | 551042        | 81304   | 65426    | 36297           | 5835           |
