# Supplementary material for: iTRAQ-based Protein Profiling and Fruit Quality Changes at Different Development Stages of Oriental Melon
Source: PubMed Central journal article supplement (PMC5273850; doi:10.1186/s12870-017-0977-7), 2017-01-28

**Additional file 7. Distribution of peptides number**

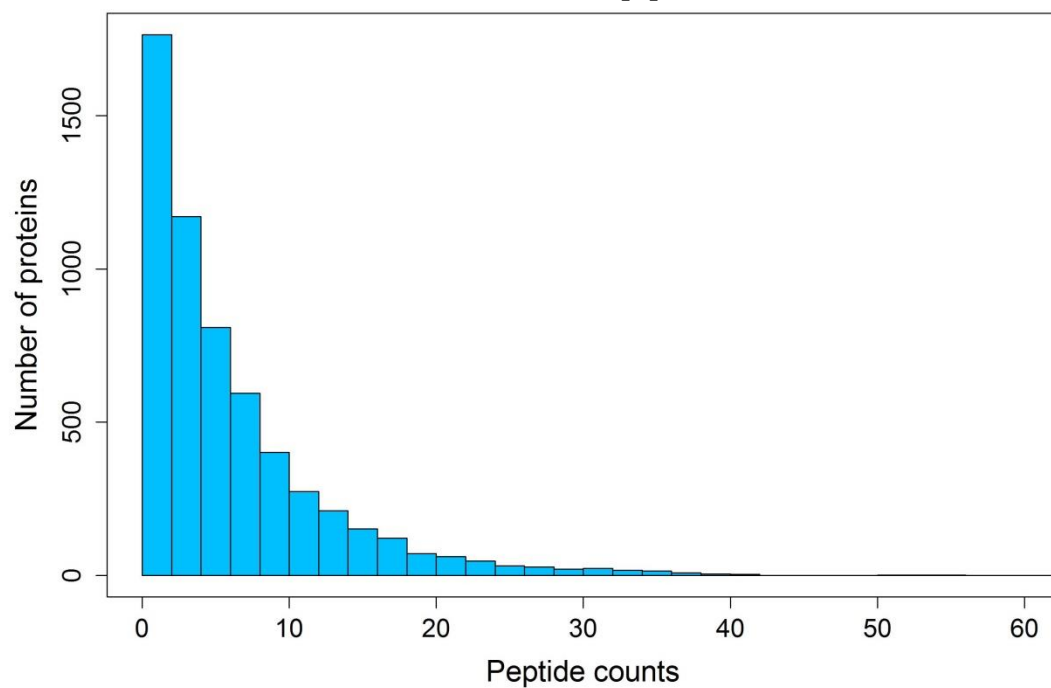

Supplement: 12870_2017_977_MOESM7_ESM.pdf [file 12870_2017_977_MOESM7_ESM.pdf]
