# Supplementary material for: iTRAQ-based Protein Profiling and Fruit Quality Changes at Different Development Stages of Oriental Melon
Source: PubMed Central journal article supplement (PMC5273850; doi:10.1186/s12870-017-0977-7), 2017-01-28

Additional file 9. Hierarchical cluster analysis of proteins in different maturity periods.

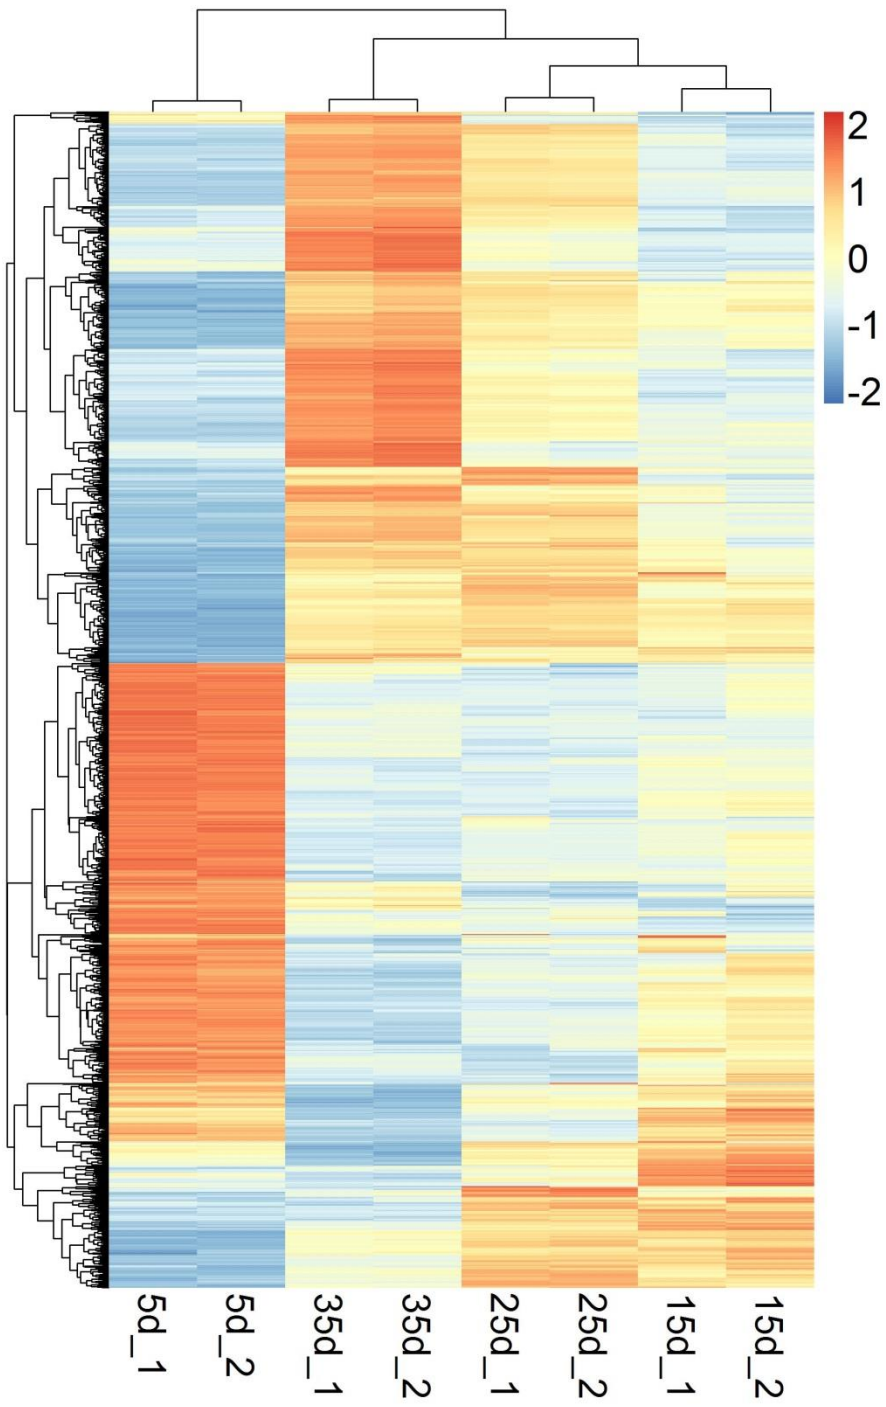

Supplement: 12870_2017_977_MOESM10_ESM.pdf [file 12870_2017_977_MOESM10_ESM.pdf]
